# Supplementary material
Source: PubMed Central journal article supplement (PMC5505773)
Supplement: NIHMS875385-supplement-Supplemental_Figures_and_Tables.pdf [file NIHMS875385-supplement-Supplemental_Figures_and_Tables.pdf]

**SUPPLEMENTAL TABLES AND FIGURES**

**Table I. Anti-atherogenic properties of the peptides *in vitro***

-, inactive, +, ++, +++, low, medium or high levels of activity

| <b>Peptide</b>                       | <b>Cholesterol efflux from macrophages</b> | <b>Inhibition of CD11b expression on monocytes</b> | <b>Inhibition of VCAM-1 expression on EC</b> | <b>Inhibition of LDL oxidation</b> |
|--------------------------------------|--------------------------------------------|----------------------------------------------------|----------------------------------------------|------------------------------------|
| ELK-2A2K2E*                          | +++                                        | +                                                  | +                                            | +                                  |
| ELKA-CH2*                            | -                                          | +++                                                | +                                            | ++                                 |
| ELK-2A*                              | -                                          | -                                                  | +++                                          | +                                  |
| 5A-CH1*                              | -                                          | +                                                  | +                                            | +++                                |
| 5A-C1* <sup>†</sup>                  | +                                          | +                                                  | +++                                          | ++                                 |
| ELK-2A2K2E /5A-C1 (1:1) <sup>†</sup> | +++                                        | +++                                                | +++                                          | ++                                 |
| 5A*                                  | ++                                         | +                                                  | +                                            | ++                                 |

\*Data derived from findings presented in reference 3.

<sup>†</sup>Data derived from findings presented in Supplemental Fig. I.

**Table II. Effect of 4-weeks peptide treatment on plasma cytokine levels**

| Cytokine                | Vehicle         | 5A                 | ELK-2A2K2E       | 5A-C1              | ELK-2A2K2E+5A-C1             | ELKA-CH1                     | ELK-2A             | 5A-CH1                       |
|-------------------------|-----------------|--------------------|------------------|--------------------|------------------------------|------------------------------|--------------------|------------------------------|
| <b>IL-23 (pg/ml)</b>    | 53.22 ± 2.76    | 261.82 ± 69.08     | 116.82 ± 43.75   | 391.48 ± 178.68    | 103.22 ± 54.39               | 223.80 ± 66.17               | 342.77 ± 116.48    | 401.67 ± 133.16              |
| <b>IL-1α (pg/ml)</b>    | 8.00 ± 1.00     | 15.75 ± 2.39       | 8.52 ± 1.32      | 10.22 ± 1.54       | 12.05 ± 3.42                 | 9.88 ± 1.46                  | 14.93 ± 2.05       | 11.98 ± 1.03                 |
| <b>IFN-γ (pg/ml)</b>    | 6.06 ± 0.65     | 15.75 ± 2.55       | 7.12 ± 1.05      | 17.91 ± 6.01       | 7.19 ± 2.49                  | 13.59 ± 2.53                 | 21.60 ± 5.50       | 16.33 ± 3.20                 |
| <b>TNF-α (pg/ml)</b>    | 10.48 ± 0.54    | 13.15 ± 1.96       | 10.74 ± 0.97     | 11.10 ± 0.95       | 32.87 ± 23.10                | 11.65 ± 1.20                 | 16.07 ± 2.15       | 12.68 ± 1.90                 |
| <b>MCP-1 (pg/ml)</b>    | 12.95 ± 2.09    | 17.88 ± 3.41       | 12.31 ± 2.26     | 13.69 ± 2.34       | 27.91 ± 17.93                | 13.83 ± 1.95                 | 19.77 ± 3.02       | 17.68 ± 3.32                 |
| <b>IL-12p70 (pg/ml)</b> | 3.70 ± 0.22     | 9.81 ± 2.51        | 4.42 ± 0.67      | 5.84 ± 1.60        | 5.95 ± 1.99                  | 8.19 ± 1.76                  | 8.23 ± 1.72        | 9.21 ± 3.66                  |
| <b>IL-1α (pg/ml)</b>    | 30.29 ± 1.02    | 55.94 ± 12.44      | 50.61 ± 15.77    | 73.31 ± 26.09      | 71.72 ± 28.53                | 49.69 ± 14.81                | 71.41 ± 15.35      | 37.00 ± 3.05                 |
| <b>IL-10 (pg/ml)</b>    | 157.23 ± 19.58  | 355 ± 83.44        | 318.27 ± 75.18   | 249.77 ± 62.53     | 216.61 ± 57.69               | 240.98 ± 45.34               | 333.9 ± 76.13      | 300.21 ± 53.62               |
| <b>IL-6 (pg/ml)</b>     | 4.65 ± 0.5      | 10.34 ± 2.37       | 8.84 ± 3.30      | 12.35 ± 5.65       | 14.62 ± 7.02                 | 7.49 ± 2.47                  | 11.06 ± 3.05       | 5.91 ± 0.69                  |
| <b>IL-27 (pg/ml)</b>    | 458.57 ± 124.20 | 1595.89 ± 531.88** | 927.24 ± 369.21  | 1551.31 ± 658.89** | 814.07 ± 333.50 <sup>†</sup> | 691.92 ± 177.07 <sup>†</sup> | 1370.75 ± 633.25** | 837.27 ± 148.51 <sup>†</sup> |
| <b>IL-17A (pg/ml)</b>   | 8.05 ± 1.54     | 27.00 ± 8.30       | 13.57 ± 3.51     | 75.64 ± 55.06      | 46.6 ± 25.81                 | 20.81 ± 7.29                 | 27.55 ± 6.16       | 14.67 ± 2.91                 |
| <b>IFN-β (pg/ml)</b>    | 725.56 ± 346.23 | 1398.61 ± 424.03*  | 1157.65 ± 458.75 | 1246.15 ± 409.40   | 1137.20 ± 680.83             | 1138.70 ± 431.56**           | 1609.33 ± 439.17   | 977.57 ± 283.20              |
| <b>GM-CSF (pg/ml)</b>   | 10.72 ± 0.48    | 27.59 ± 7.98       | 20.70 ± 7.38     | 34.96 ± 13.69      | 24.22 ± 10.92                | 23.54 ± 6.85                 | 29.27 ± 8.43       | 19.77 ± 3.61                 |

Data shown as mean ± SEM. \* p<0.05, \*\* p<0.01 *versus* vehicle. <sup>†</sup> p<0.05 *versus* 5A, <sup>‡</sup> p<0.05 *versus* 5A-C1

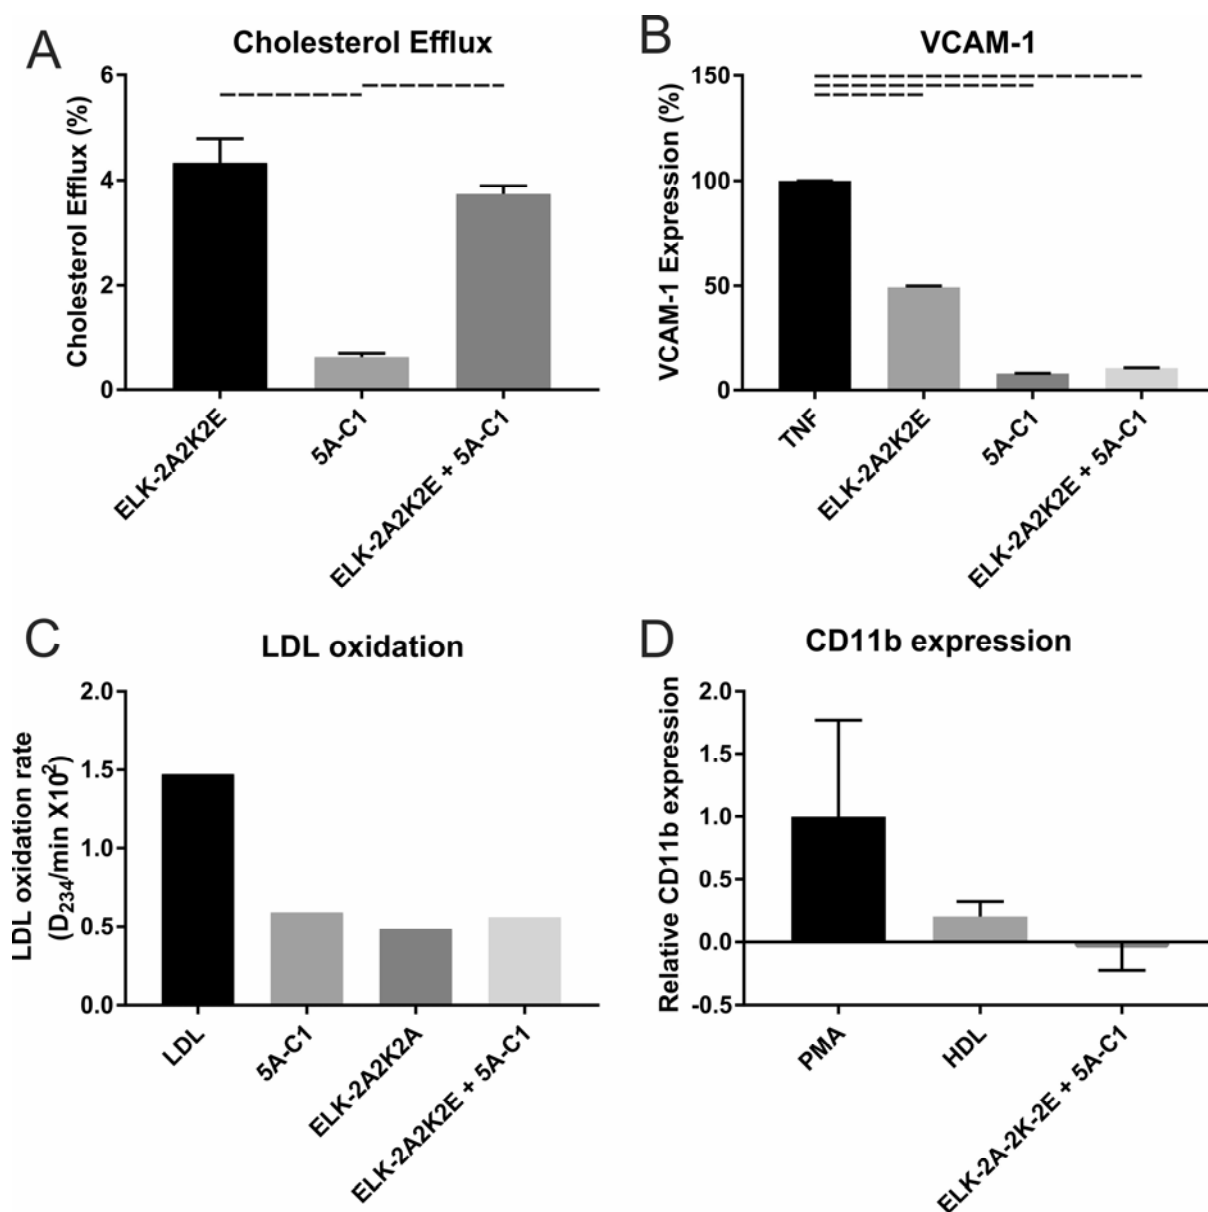

**Supplemental Figure I. The effect of combination of the peptides on anti-atherogenic properties in vitro.**

In “combination” the peptides were added at proportion 1:1 (w/w); each peptide was added at half the concentration compared to that when tested individually. **A** – Cholesterol efflux from RAW 264.7 cells. Peptide concentration 10 µg/ml; **B** – VCAM-1 expression in endothelial cells. Peptide concentration 0.75 mg/ml; **C** – LDL oxidation. Peptide concentration 100 µg/ml; **D** – CD11b expression in human monocytes. Peptide concentration 40 µg/ml. Methodology of each of the assay is described in the Materials and Method section. Dashed lines connect pairs with  $p < 0.01$ .

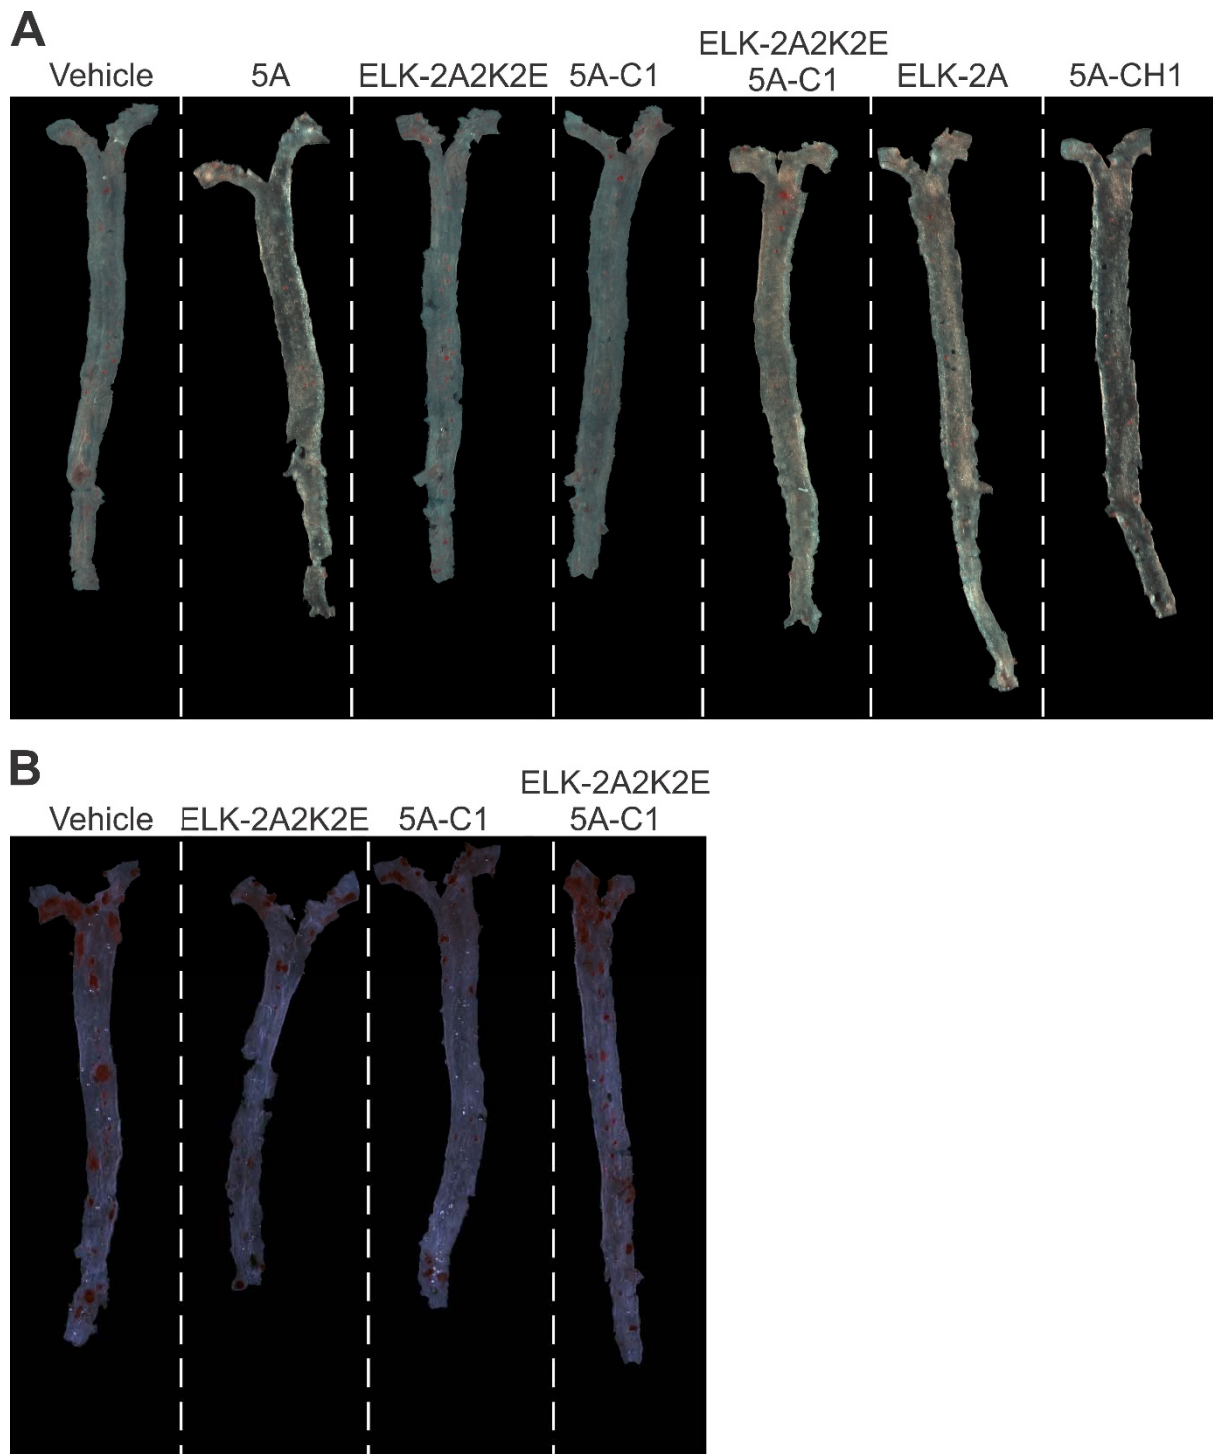

**Supplemental Figure II. Representative *en face* images of the aortae of mice treated with the peptides.**

A- Early lesions from 4 weeks study. B – Atherosclerotic lesions from 12 weeks study. The background around the vessels was replaced with uniform black to assist with visual assessment .

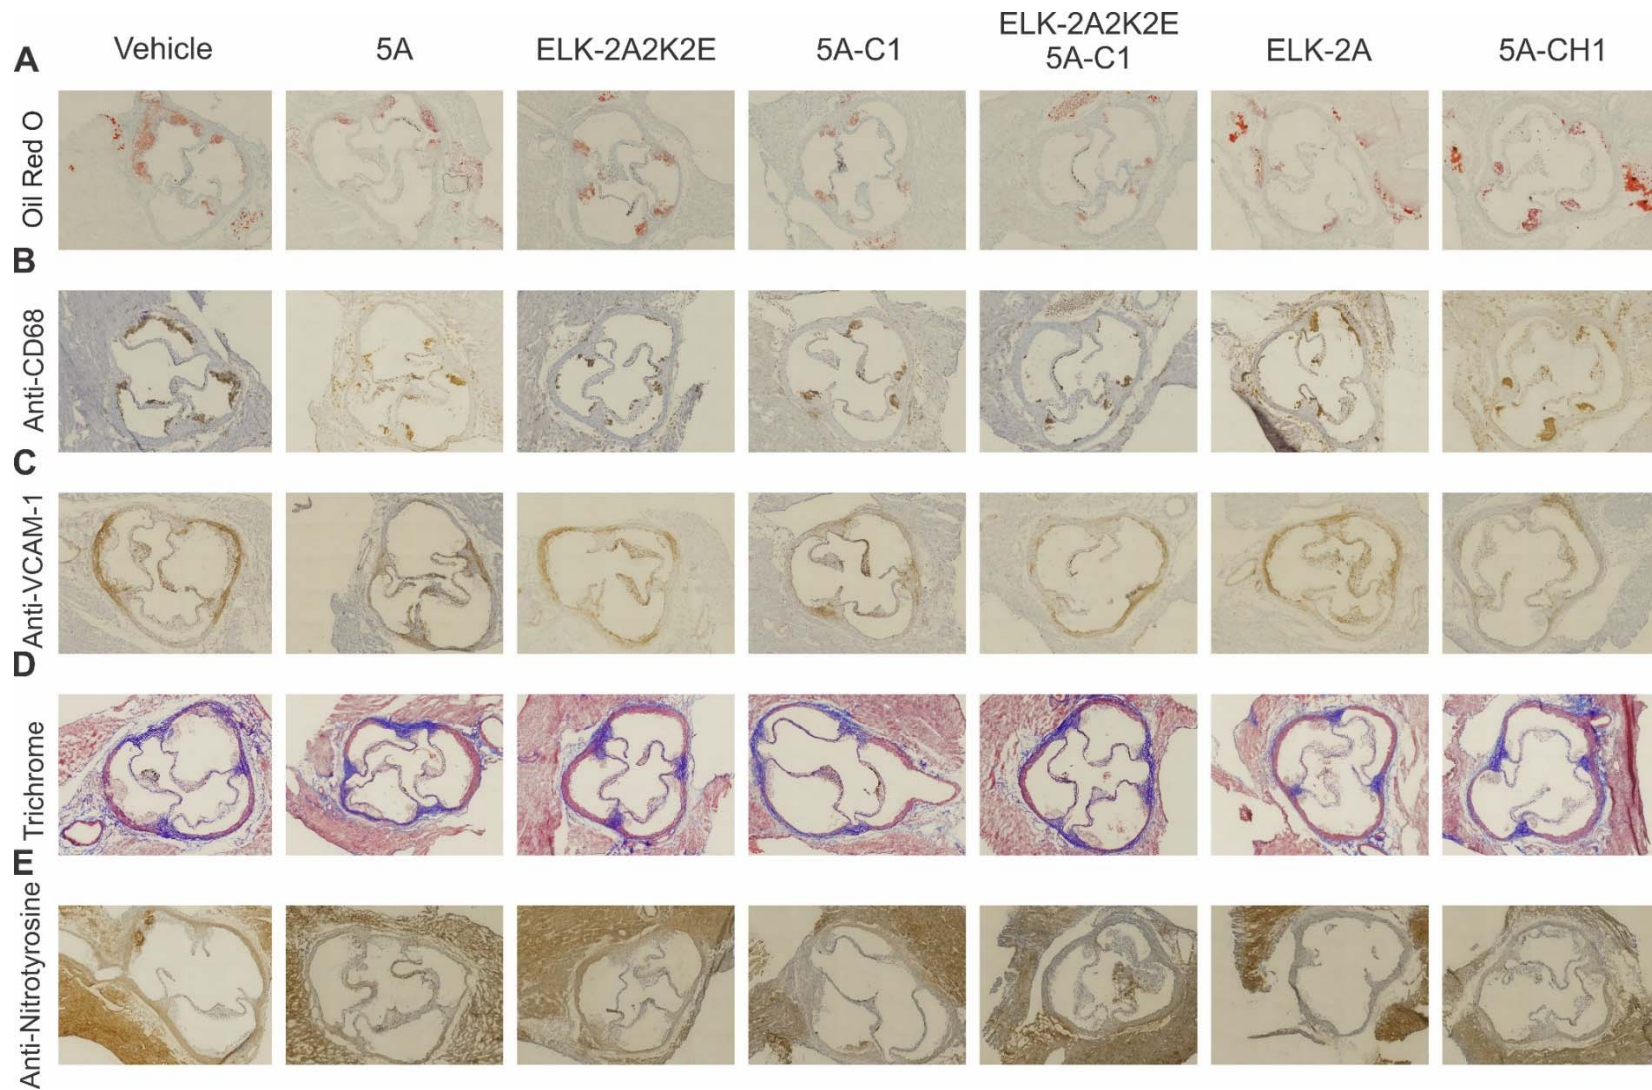

Supplemental Figure III. Morphology and immunostaining of aortic sinus sections after 4 weeks treatment with the peptides.

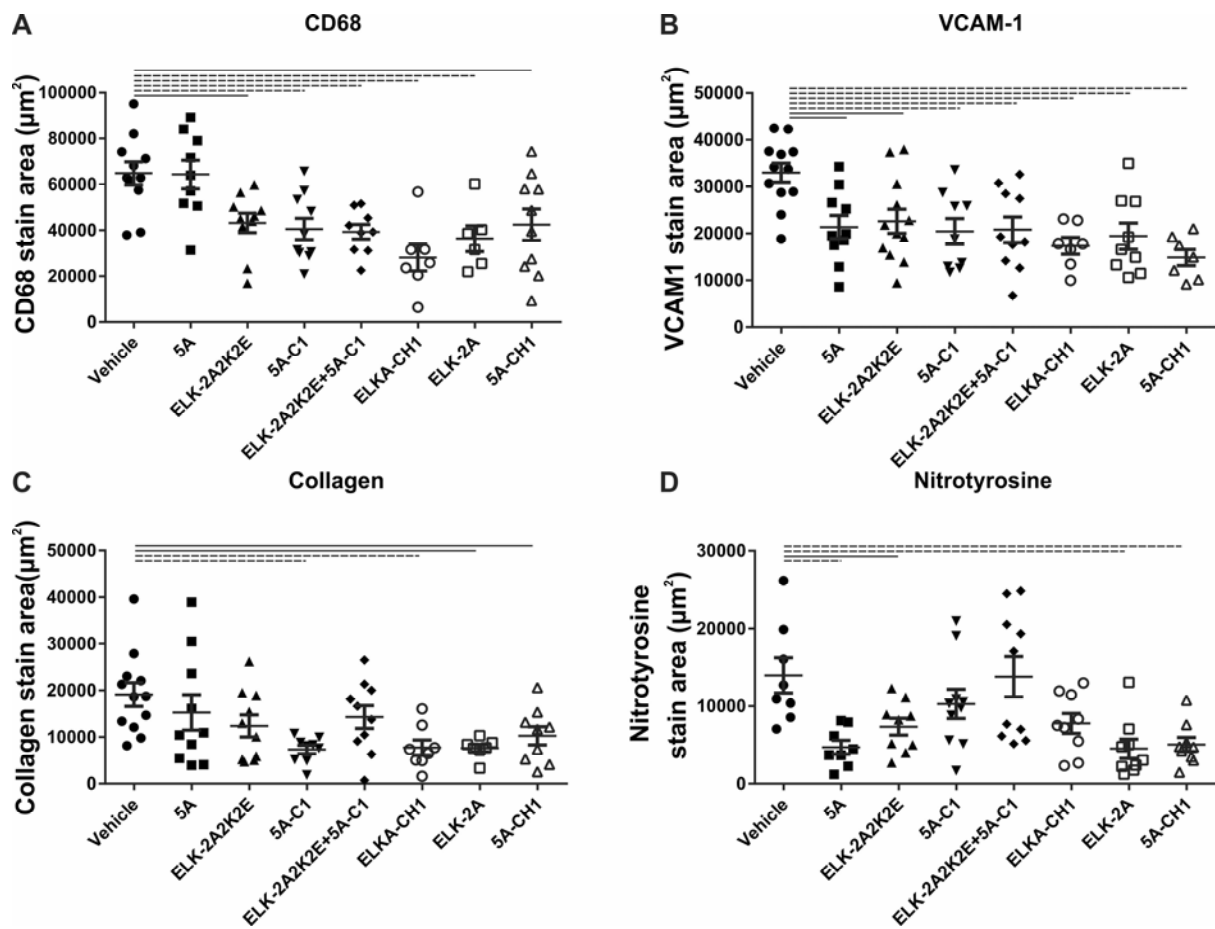

**Supplemental Figure IV: Absolute values of the abundance of CD68+ cells (A), VCAM-1 (B), collagen (C) and nitrotyrosine (D) in early lesions; the effect of apoA-I mimetic peptides.**

Solid lines connect pairs with  $p < 0.05$ ; dashed lines connect pairs with  $p < 0.01$

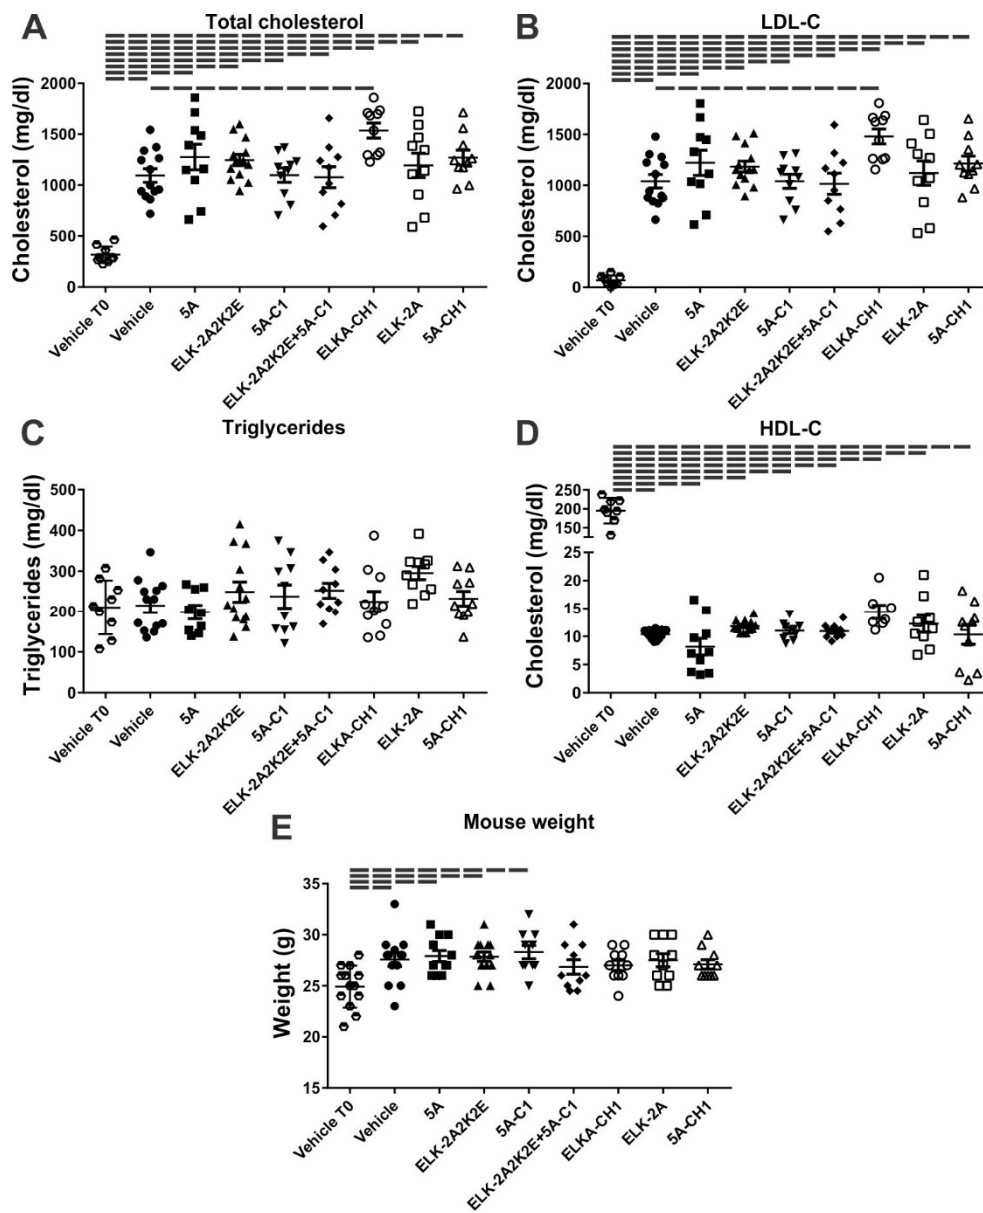

**Supplemental Figure V. Plasma lipoprotein concentration and body weight after 4 weeks treatment with the peptides.**

Effect of 4 week HFD feeding and peptide treatment on total cholesterol (A), LDL-C (B), triglycerides (C), HDL-C (D) and weight (E). Lipoprotein concentrations were determined as described in Materials and Methods section. Dashed lines connect pairs with  $p < 0.01$ . “Vehicle T0” refers to time-point prior to commencement of HFD.



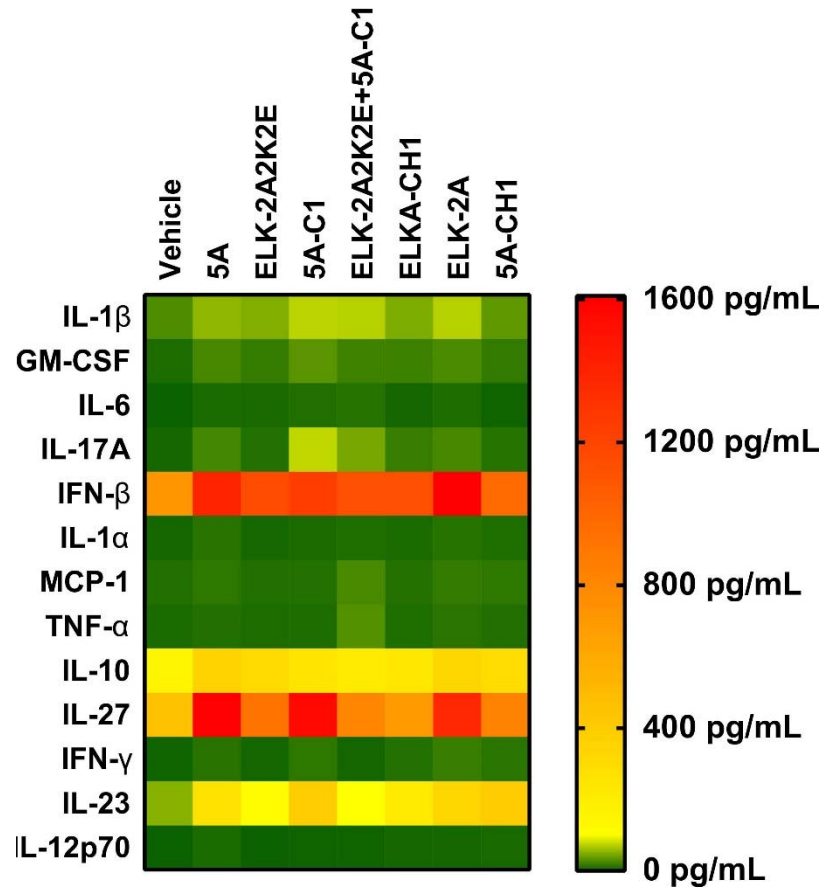

**Supplemental Figure VI. Heat Diagram of the effect of 4-weeks peptide treatment on plasma cytokine levels.**

This figure is representation of the data shown in Table II.

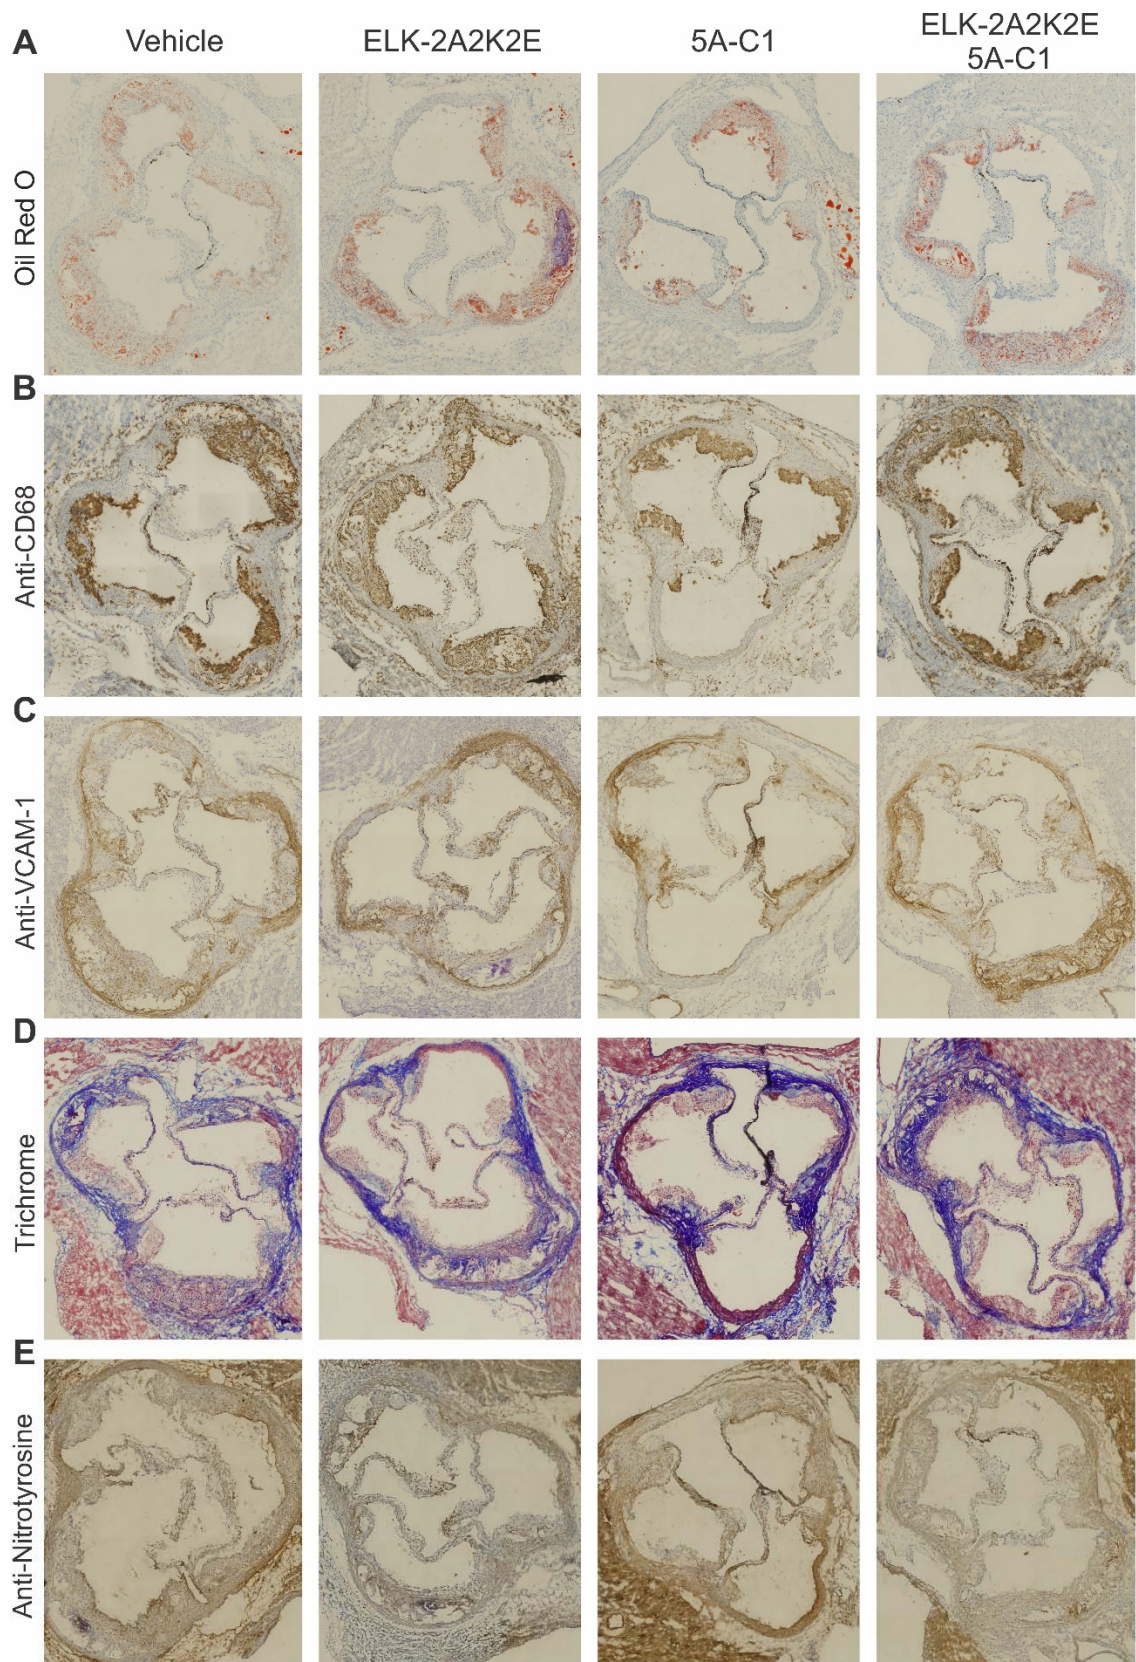

**Supplemental Figure VII. Morphology and immunostaining of aortic sinus sections after 12 weeks treatment with the peptides.**

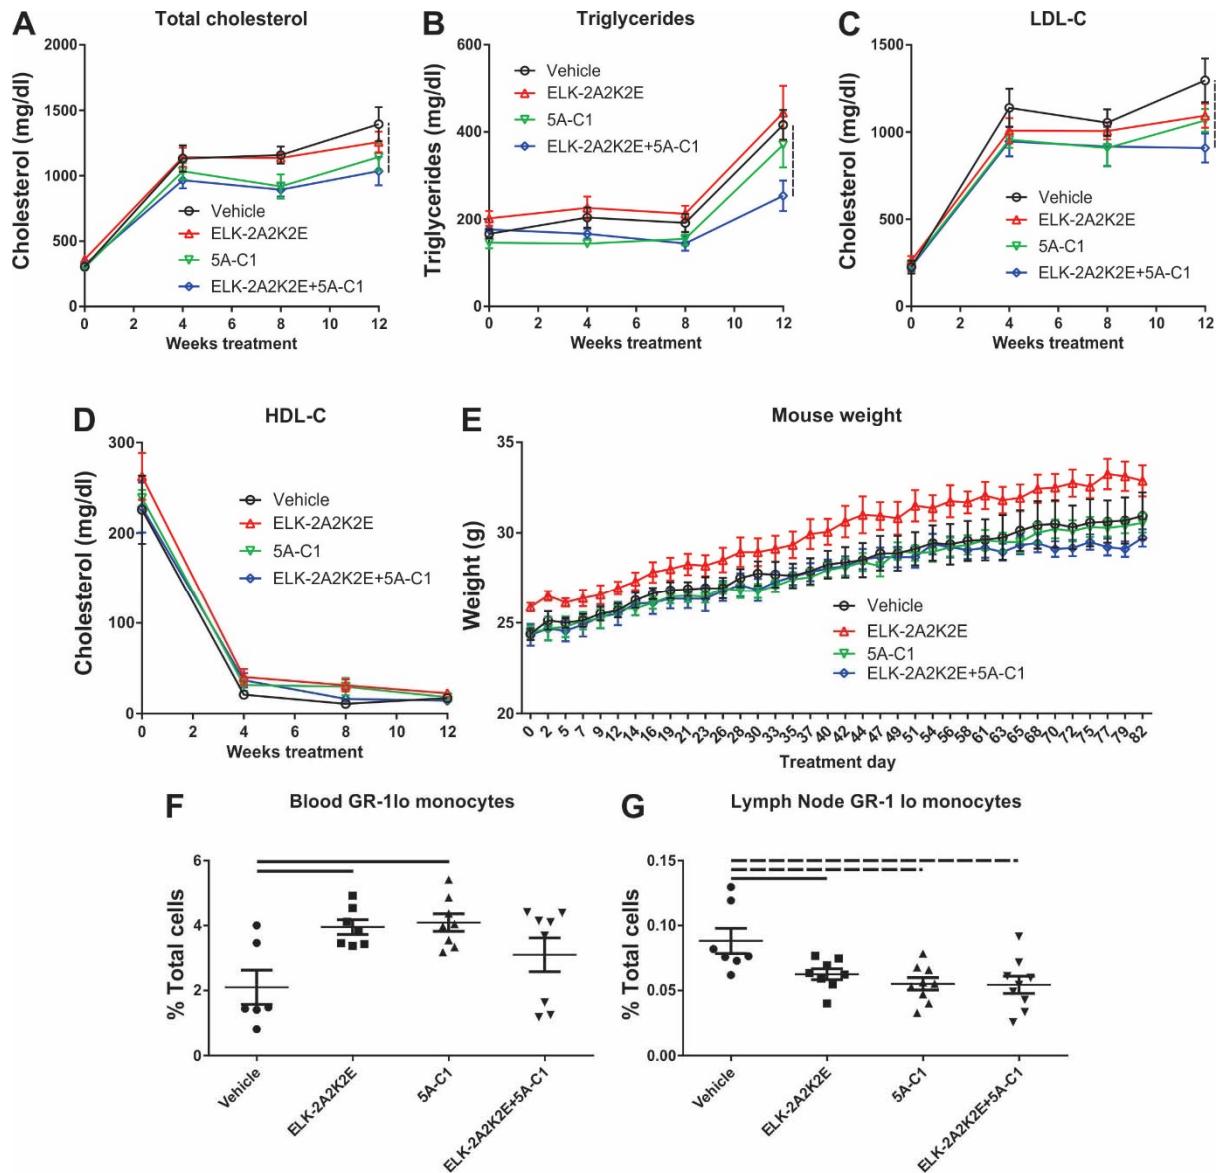

**Supplemental Figure VIII. Plasma lipoprotein concentration and body weight after 12 weeks HFD feeding and treatment with the peptides (A-E). Proportion of GR-Lo monocytes in blood and lymph nodes (F,G).**

**A** – total cholesterol; **B** – LDL-C; **C** – triglycerides; **D** – HDL-C; **E** – body weight; **F** - GR1lo monocytes in blood; **G** – GR1lo monocytes in lymph nodes. Lipoprotein concentrations were determined and immune cells quantitated as described in Materials and Methods section. Solid lines connect pairs with  $p < 0.05$ , dashed lines connect pairs with  $p < 0.01$ . . “Vehicle T0” refers to time-point prior to commencement of HFD.

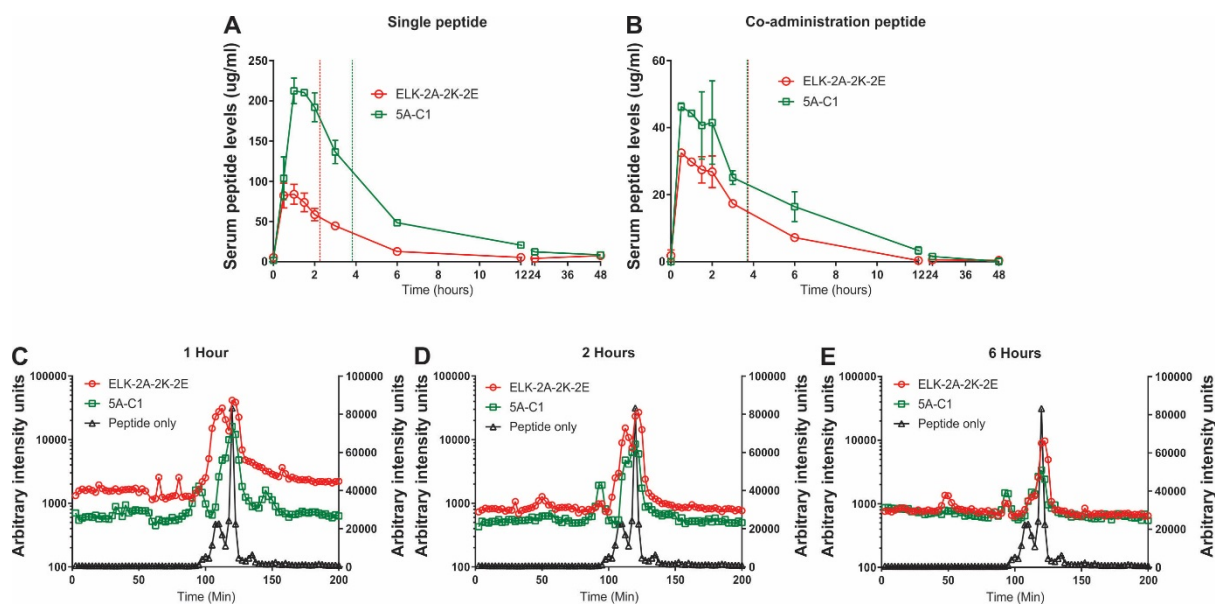

**Supplemental Figure IX. Pharmacokinetics and biodistribution of the peptides**

**A, B** - 1mg of fluorescently labelled 5A-C1 (green) and ELK-2A2K2E (red) were administered one at a time (**A**) or as 1:1 combination (**B**) via intraperitoneal injection to ApoE<sup>-/-</sup> mice fed HFD for 2 weeks. Vertical dashed lines indicate the calculated half-life of each peptide in plasma.

**C-E** – To elucidate peptide distribution in lipoprotein fractions plasma was separated by FPLC and individual fractions analysed for fluorescence. Fluorescently labelled peptide lipoprotein distribution one (**C**), two (**D**) and six (**E**) hours post injection are shown.

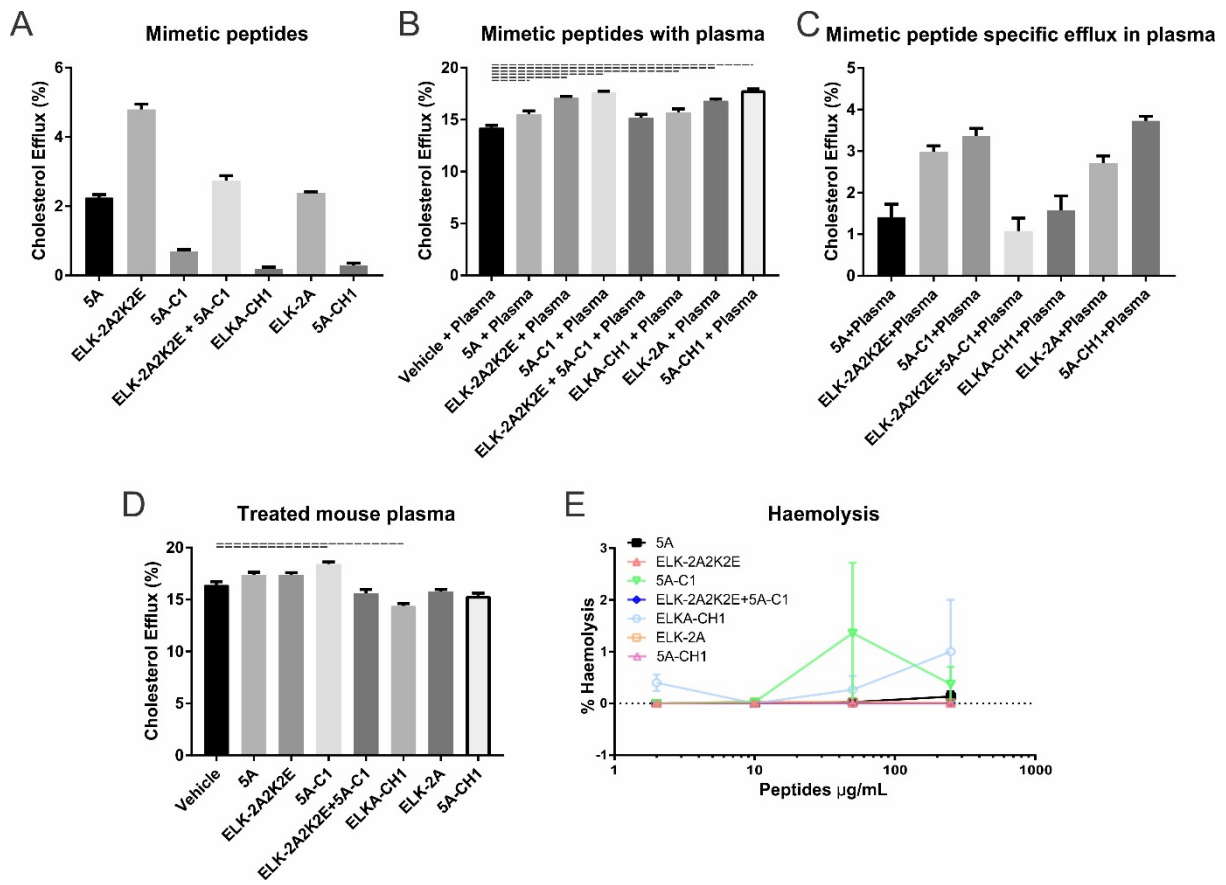

**Supplemental Figure X. Functionality of the peptides in plasma.**

**A** – Cholesterol efflux to the lipid-free peptides. **B** – Cholesterol efflux to the peptides added to mouse plasma in vitro and incubated for 1 h prior to the efflux assay. **C** – Values of cholesterol efflux to the peptides added to mouse plasma after subtraction of the efflux to plasma without peptides. **D** – Cholesterol efflux to plasma from mice treated with the peptides. **E** – Haemolysis following a 2 hour incubation of murine RBC with peptides.
