# Supplementary material
Source: PubMed Central journal article supplement (PMC5505773)

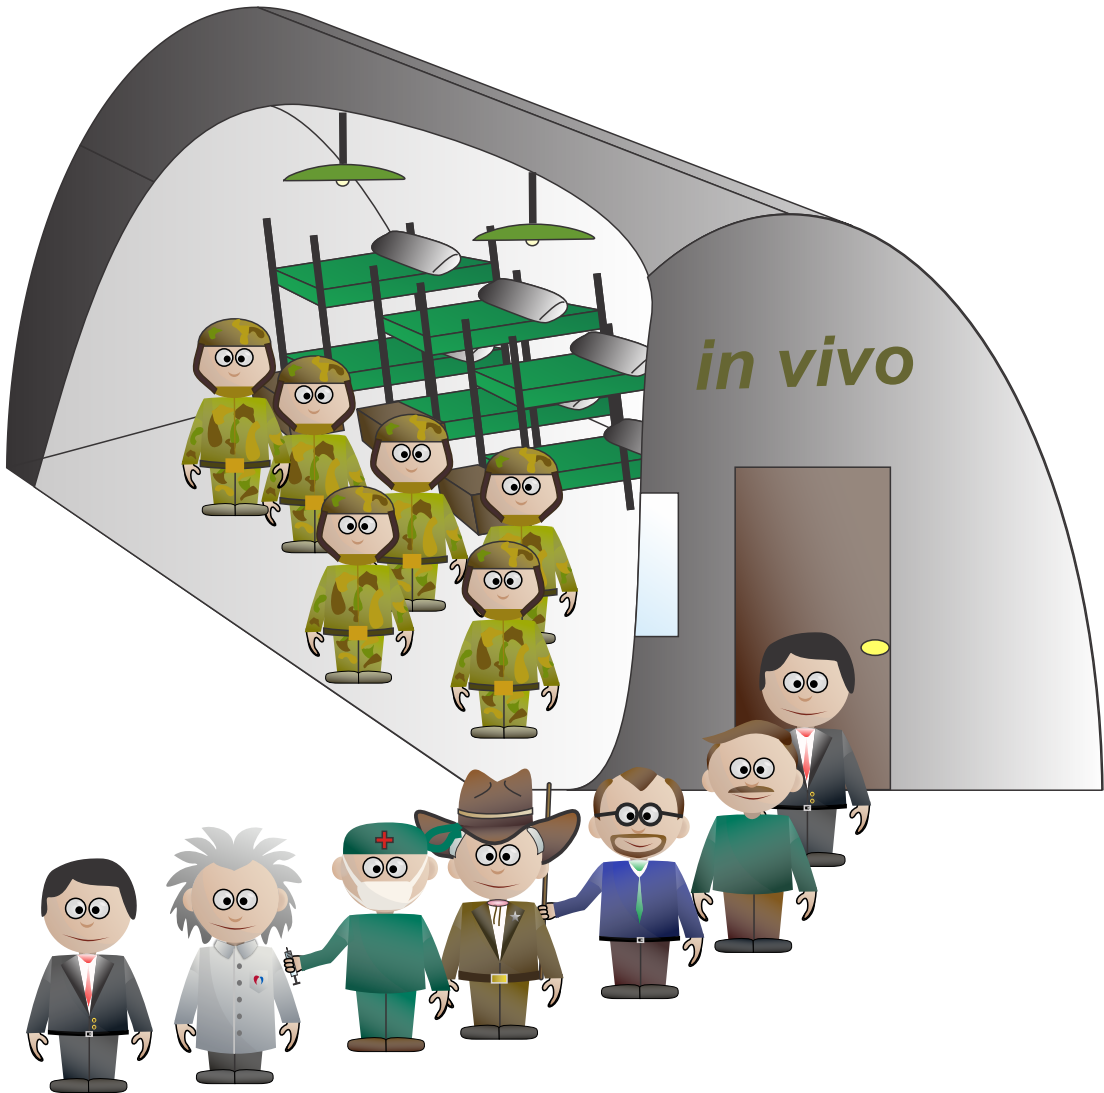

*in vivo*

Supplement: NIHMS875385-supplement-Graphic_Abstract.pdf [file NIHMS875385-supplement-Graphic_Abstract.pdf]
